# Supplementary material
Source: PubMed Central journal article supplement (PMC2423209)
Supplement: NIHMS46976-supplement-01.pdf [file NIHMS46976-supplement-01.pdf]

## Supplemental Data

### Retrotransposon Tf1 Is Targeted to Pol II

#### Promoters by Transcription Activators

Young-Eun Leem, Tracy Ripmaster, Felice Kelly, Hirotaka Ebina, Marc Heincelman, Ke Zhang, Shiv I.S. Grewal, Charles S. Hoffman, and Henry L. Levin

#### SUPPLEMENTAL EXPERIMENTAL PROCEDURES

Plasmid constructions and cell growth- The construction of pHL414-2 has been described previously (Levin et al., 1993). To generate pHL2541, a precise deletion of the beta-lactamase gene (*bla*) of pHL414-2 was created by replacing the Bst API-Mlu I fragment with a product of fusion PCR. The primers used for this and all other constructs are described in the supplementary material (Table S1). The plasmids produced and the strains of *S. pombe* containing the plasmids are listed in Tables S2 and S3, respectively. To create the target plasmid with *bub1-ade6*, pHL2410, a 1.2 kb Sph I fragment encoding thymidine kinase was removed from pNR210 (a gift of N. Rhind and P. Russell, Scripps Research Institute, La Jolla, CA). *LEU2d* of pESP1 (Stratagene, La Jolla, CA) was then inserted into the resulting plasmid as a PCR fragment into the Sph I and Xma I sites. The deletions of pHL2410 were created using fusion PCR products and the oligonucleotides used are indicated in supplementary Table S2. To create deletion constructs B, E, F, G, H, I, J, K, and M, fusion PCR products were inserted into the Sbf I and Bmg BI sites of pHL2410. Deletion C was created by inserting a fusion PCR product into the Sbf I and Spe I sites of pHL2410. Deletion D was generated by inserting a fusion PCR product into the Bmg BI and Spe I sites of pHL2410. Deletion construct L (pHL2653) was created by inserting the 173 bp PCR product containing the target window into the Xma I and Spe I

sites of pHL2410. The target plasmid with *fbp1*, pHL2543, was made by first destroying the Hind III site in pHL1288 (Balasundaram et al., 1999) that is at the 3' end of *LEU2*. The resulting plasmid, pHL2542, has a unique Hind III site into which was inserted the 3.2 kb Hind III fragment of pAV06 (Vassarotti and Friesen, 1985) that contains *fbp1*. The product of this ligation, pHL2543, has *fbp1* oriented so that it is transcribed towards *LEU2*. The single and six-nucleotide substitutions in UAS1 of the *fbp1* promoter were generated according to the protocol of QuickChange II Site-Directed Mutagenesis kit (STRATAGENE, La Jolla, CA). The mutagenic primers containing the 6 nt mutation used were HL1907 and HL1908.

The target plasmid with *nup124*, pHL1338 was generated previously as a derivative of pHL1288 (Balasundaram et al., 1999). The target plasmids containing *SPCC4F11.03c* and *SPBC365.14c* were pHL2603 and pHL2688, respectively, and were constructed by inserting PCR products into the Sbf I and Spe I sites of pHL2410. The plasmid that expressed TAP-IN, pHL2512, was produced first by PCR amplifying IN coding sequence using primers HL1248 and HL1249. The product was inserted into the Nde I and Bam HI sites of pREP1-NTAP (Tasto et al., 2001). Then the sequence encoding TAP and IN was amplified with primers HL1262 and HL1263 to add an NLS at the N-terminus of TAP-IN. This product was inserted into the Pac I and Bsr GI sites of the TAP-IN plasmid to generate pHL2512.

The *atf1* gene was deleted from YHL1101 using the drug-resistance marker, *nat1*, encoding nourseothricin acetyltransferase (Sato et al., 2005). A fragment of DNA containing the *nat1* gene flanked by 80 nt of sequence adjacent to *atf1* was created by PCR using pCR2.1-*nat* (pHL2621) as the template and HL1574 and HL1575 as the

primers. To induce homologous recombination between *atf1* and the *nat1*-containing fragment, 5 µg of the *nat1* DNA was introduced to YHL1101 by lithium acetate transformation. NAT resistant colonies were isolated on YES plates containing NAT (nourseothricin, commercial name; clon NAT, WERNER BioAgents, Germany) (100 µg/ml). DNA blots and PCR were performed to confirm the single gene deletion.

Selective media contained Edinburgh minimal media (EMM) (Moreno et al., 1991) and 2 g of dropout mix similar to that of Rose *et al* (Rose et al., 1990) except adenine levels were increased to a final concentration of 250 µg/ml. A liter of rich media, YES, contained 5 g Difco yeast extract, 30 g glucose, and 2 g of dropout powder. When indicated, 10 µM vitamin B1 was added to repress the *nmt1* promoter. EMM 5-FOA plates contained 1 mg/ml 5-Fluoroorotic acid (#F5050, United States Biologicals, Swampscott, MA). YES FOA/G418 contained 500 µg/ml (corrected for purity) of Geneticin (#11811-031, Life Technologies, Rockville, MD) and 1 mg/ml 5-FOA. All strains of *S. pombe* were YHL1101 (*h+*, *ura4-D18*, *leu1-32*, *ade6-M210*) transformed by lithium acetate with various plasmids.

Target plasmid assay- Target plasmids were introduced into *S. pombe* by transformation with lithium acetate followed by selection on EMM medium lacking leucine. These strains were then transformed with the Tf1 plasmid by selecting on EMM lacking leucine and uracil. Strains were arranged on EMM-leu-ura+B1 plates in two cm<sup>2</sup> patches. Following 48 hrs of incubation these plates were replica printed to EMM-leu-ura-B1 to induce transposition. After four days of incubation the strains were printed to EMM-leu+FOA+B1 to select against the Tf1 donor plasmid. Following two days of incubation

the plates were again printed to EMM-leu+FOA+B1. To select for transposition events, the strains were then printed to EMM-leu+FOA+G418. After two days growth the patches were washed in 0.5 ml dH<sub>2</sub>O and resuspended in 0.5 ml citrate phosphate sorbitol buffer with zymolase 100T (50 mM Na<sub>2</sub>HPO<sub>4</sub>, 50 mM Citric acid, 1.2 M Sorbitol, [buffer adjusted to pH5.6] 2 mg/ml Zymolase 100T from Seikagaku) and incubated at 37 °C for 1 hr. After the incubation, the cells were resuspended in 100 µl TE (10 mM Tris-HCl pH 7.9, 1 mM EDTA). Twelve microliters of 10% SDS was added and the cells were incubated at 65 °C for 5 min. Then 33 µl of 5 M potassium acetate was added, the samples were mixed well and placed on ice for 30 min. The cells were then centrifuged at 4 °C for 10 min at 14,000 rpm in a minifuge. The supernatants were ethanol precipitated and the pellets were resuspended in 100 µl of 1X TE. These samples were phenol extracted and ethanol precipitated. This material was then electroporated into bacteria. Construct A (pHL2410) was assayed with pHL414-2 as its source of Tf1-*neo* while the remainder of the deletion constructs were assayed with pHL2541. The insertions in construct A and the plasmid with *fbpI* were derived from three independent yeast transformants. Each one gave similar patterns of integration. For the remainder of the constructs the inserts were also isolated from independent transformants.

RNA blots- Forty ml of cells harvested at OD<sub>600</sub>=1.0 were resuspended in 400 µl of buffer AE (50 mM NaOAc, pH 5.3, and 10 mM EDTA) and 40 µl of 10% SDS. The resuspended cells were transferred to a 2 ml tube containing 400 µl of phenol equilibrated with water, and 400 µl of acid-washed glass-beads (0.4 mm diameter) and they were disrupted in a Mini-Beadbeater-8 (Biospec Products, Bartlesville, OK) for a total of five

min in cycles of 30 sec on, 30 sec off. The cell lysates were cooled at -80 °C for 10 min before centrifugation for 5 min to separate the aqueous phase from the cell debris, phenol and beads. Phenol-chloroform extraction was repeated until the interface was no longer white. Ten µg of total RNA was loaded on a 1.0% formamide denaturing gel. After the RNA was transferred to a nylon membrane, it was hybridized with PCR generated probes specific for *ade6* or *bub1*. The primers are listed in Table S1. The actin probe was produced from a one kb Eco RI-Bam HI fragment of pHL859-1. The RNAs prepared for Fig. 2B and 2C were derived from strains YHL9318-YHL9321, YHL9323, YHL9325, YHL9326, and YHL9328. For each deletion plasmid two yeast transformants were analyzed and found to produce similar amounts of *ade6* and *bub1* mRNA. The levels of RNA from the separate transformants were quantified with phosphoimaging and averaged. For Fig. 4, The RNAs were derived from YHL9435 through YHL9440. Four separate transformants of each plasmid were included on the RNA blot and the levels of signal were averaged.

Micrococcal nuclease mapping- Cultures of YHL8964 and YHL9085 were grown to a final OD<sub>600</sub> of 0.5-0.7. One gram of cells (two 500 ml cultures) was washed three times with 250 ml sterile water, resuspended in 2 ml of preincubation buffer (0.7 M beta-mercaptoethanol, 3 mM EDTA, 20 mM Tris-HCl pH 8.0) and agitated at 30 °C for 10 min. After a wash in 5 ml 1 M Sorbitol, the cells were resuspended in 2.5 ml of zymolyase solution without zymolyase (37.5 mM Tris-HCl (pH 7.5), 0.75 M Sorbitol, 1.25% Glucose, 6.25 mM EDTA). Once resuspended, 2.5 ml of zymolyase solution with zymolyase (0.25% Zymolyase-100T from Seikagaku) was added and the cells were

agitated at 30 °C for 20 min. Following centrifugation, the pellets were washed with 1 M Sorbitol and resuspended in 7 ml of lysis buffer (18% Ficoll 400, 10 mM KH<sub>2</sub>PO<sub>4</sub>, 10 mM K<sub>2</sub>HPO<sub>4</sub>, 1 mM MgCl<sub>2</sub>, 0.25 mM EGTA, 0.25 mM EDTA, and 1 mM PMSF). After centrifugation in a SS34 rotor (Sorvall) at 13,000 rpm at 4 °C for 40 min the pellets were resuspended in 8 ml buffer A (10 mM Tris-HCl (pH 8.0), 150 mM NaCl, 5 mM KCl, 1 mM EDTA (pH 8.0), 1 mM PMSF) until no particles were visible. Five µl of 1 M CaCl<sub>2</sub> was added to 1 ml aliquots of the resuspension and each aliquot was digested for 5 min at 37 °C with different amounts of 10 U/µl MNase that achieved final concentrations of 0, 20, 30, 50, 225 U/ml. The reactions were subsequently stopped by the addition of 20 mM EDTA and 1% SDS (final concentrations) and incubated with 40 µg Proteinase K (Merck) at 50 °C overnight. After centrifugation, 1 ml of supernatant was phenol/CHCl<sub>3</sub> extracted and digested with a final concentration of 0.16 mg/ml RNase A at 37 °C for two hrs. Two additional extractions with phenol/CHCl<sub>3</sub> were performed followed by a CHCl<sub>3</sub> extraction and ethanol precipitation. For YHL8964 and YHL9085 600 ng of the DNA were digested with Eco RI. After digestion, the DNAs were ethanol precipitated, loaded on a 1% TBE agarose gel (25 cm long). As a control for sequence preferences of MNase, 600 ng of naked DNA treated with increasing amounts of MNase (see below for preparation) was included on the gel. Electrophoresis ran in the cold room at 80 V for 24 hrs in 1X TBE. The gel was then transferred to GeneScreen plus membrane and hybridized. The *bub1-ade6* sequence was probed with a 200 bp PCR product generated with the primers HL1317 and HL1318.

Two µg of naked DNA from YHL8964 (for Fig. 2D) was digested with 0.2, 0.4, and 2.0 units of MNase for 5 min at 37 °C. After 5 min, the reactions were stopped with 4

$\mu$ l of 0.5 M EDTA. All three concentrations of digests were pooled together and extracted with phenol/chloroform and ethanol precipitated. This material was included on the gel containing MNase digests of the chromatin fractions.

Preparation of naked DNA for MNase digestion- Cells of YHL8964 were inoculated in EMM -ura, -leu +B1 at an OD of 0.05 and grown for ~36-40 hrs until they reached OD=8.0. One hundred ml of cells were resuspended in 2.5 ml of SP1 (1.2 M Sorbitol, 50 mM Citric acid monohydrate, 50 mM Na<sub>2</sub>HPO<sub>4</sub>\*7H<sub>2</sub>O, 40 mM EDTA with 5 M NaOH to make pH 5.6) containing 15 mg zymolyase. The cells were incubated at 37 °C for 2 hrs or until cells became dark under a phase-contrast microscope. The spheroplasted cells were pelleted by spinning at 3000 rpm for 5 min in a minifuge. The pellets were resuspended in 7.5 ml of 5X TE and 0.75 ml of 10% SDS was added followed by an incubation at room temperature for 1 hr. Then the mixture was incubated at 65 °C for 5 min. After transfer to 14 ml Falcon snap cap tubes 2.5 ml of 5 M KOAc was added and the samples were incubated at room temperature for 30 min. To remove debris the mixtures were centrifuged at 5000 rpm for 15 min in a SS34 rotor. The supernatant was pipetted into a new tube and 10 ml of ice-cold isopropanol was added. After incubation on ice for 5 min the mixture was centrifuged at 8000 rpm (SS34) for 10 min to pellet the nucleic acids. The pellet was resuspended in 3 ml 5X TE and RNase A was added to a final concentration of 100  $\mu$ g/ml. After an incubation of 1 hr at 37 °C, 0.1 ml 10% SDS was added followed by the addition of Proteinase K to final concentration of 50  $\mu$ g/ml. The samples were incubated overnight at 50 °C. Then 3 ml of equilibrated phenol was added and the samples were mixed gently and thoroughly. After centrifugation at 5000

rpm (SS34) for 5 min the phenol extraction was repeated. Then the samples were extracted with 3 ml of phenol/CHCl<sub>3</sub>/isoamyl alcohol. The DNA was then precipitated by adding 1/10 volume 5 M NaCl and 2.5 volumes 100% ethanol. After centrifugation at 8000 rpm (SS34) for 10 min, the pellets were washed using 2 ml 70% ethanol and air-dried. The DNA was resuspended in 100 µl 1X TE. Ten microliters were run on a 1% gel to determine concentration.

Coimmunoprecipitation- YHL1101 (wild type) or SPJ152 (*atf1*-FLAG::KanMx6) was transformed with pHL2512, a TAP-IN expression plasmid. Ten milliliters of each transformant was harvested at OD 1.0-1.5 and extracted with a bead beater in 200 µl of NP-40 buffer (50mM Tris-Cl pH8.0, 150mM NaCl, 10% Glycerol, 1mM EDTA, 1mM DTT, 0.2mM PMSF, 0.1% NP-40, Complete protease inhibitor [Roche]) and 100 µl of glass beads. Five hundred micrograms of extracted proteins were immunoprecipitated with 30 µl of prewashed anti-FLAG M2 agarose (Sigma). After an incubation of two hours at 4.0 °C the precipitate was washed six times in 500 µl of the NP-40 buffer. The protein bound to the beads were eluted in 35 µl of 2x sample buffer with a 30 min incubation at 37°C.

Chromatin immunoprecipitation- ChIP was performed as described in (Noma et al., 2001). For this experiment, the strain SPJ-152 was chosen, in which *atf1* was tagged with FLAG in the genome. The recruitment of Atf1p was tested using anti-FLAG antibody. The primer sets used were: for *ade6*, HL1201 and HL2061; for *fbp1*, HL2058 and HL2059; and for *act*, HL1446 and HL2063. To calculate the relative enrichment of Atf1p



in the promoters of *ade6* and *fbp1*, *ade6* or *bub1* signal intensity was normalized by actin signal and then, this ChIP signal was normalized further by the signal intensity from the whole cell extract.

## References

- Balasundaram, D., Benedik, M. J., Morpew, M., Dang, V. D., and Levin, H. L. (1999). Nup124p Is a Nuclear Pore Factor of *Schizosaccharomyces pombe* That Is Important for Nuclear Import and Activity of Retrotransposon Tf1. *Mol Cell Biol* *19*, 5768-5784.
- Levin, H. L., Weaver, D. C., and Boeke, J. D. (1993). Novel gene expression mechanism in a fission yeast retroelement: Tf1 proteins are derived from a single primary translation product [published erratum appears in *EMBO J* 1994 Mar 15;13(6):1494]. *Embo J* *12*, 4885-4895.
- Moreno, S., Klar, A., and Nurse, P. (1991). Molecular genetic analysis of fission yeast *Schizosaccharomyces pombe*. *Methods in Enzymology* *194*, 795-823.
- Noma, K., Allis, C. D., and Grewal, S. I. S. (2001). Transitions in distinct histone H3 methylation patterns at the heterochromatin domain boundaries. *Science* *293*, 1150-1155.
- Rose, M. D., Winston, F., and Hieter, P. (1990). *Methods in yeast genetics: a laboratory course manual* (Cold Spring Harbor, N.Y., Cold Spring Harbor, Laboratory).
- Sato, M., Dhut, S., and Toda, T. (2005). New drug-resistant cassettes for gene disruption and epitope tagging in *Schizosaccharomyces pombe*. *Yeast* *22*, 583-591.

Tasto, J., Carnahan, R., McDonald, W., and Gould, K. L. (2001). Vectors and gene targeting modules for tandem affinity purification in *Schizosaccharomyces pombe*. *18*, 657–662.

Vassarotti, A., and Friesen, J. D. (1985). Isolation of the Fructose-1,6-Bisphosphatase Gene of the Yeast *Schizosaccharomyces-Pombe* - Evidence for Transcriptional Regulation. *Journal of Biological Chemistry* *260*, 6348-6353.

Table S1: Oligonucleotides used in construction of plasmids.

| Purpose                                                                                                                                  | Oligonucleotide                                                                     |
|------------------------------------------------------------------------------------------------------------------------------------------|-------------------------------------------------------------------------------------|
| Deletion of amp from pHL414-2 by fusion PCR. Is upstream of the <i>MluI</i> site in pHL414-2.                                            | HL1303: CCAAGGACGTACAAAATAGAAAAC                                                    |
| Deletion of amp from pHL414-2 by fusion PCR. Is downstream of the <i>BstAPI</i> site in pHL414-2.                                        | HL1304: CACGTAGCGATAGCGGAGTG                                                        |
| Deletion of amp from pHL414-2 by fusion PCR. Is top strand primer at the end of amp.                                                     | HL1305: CTGTCAGACCAAGTTTACTC                                                        |
| Deletion of amp from pHL414-2 by fusion PCR. Is bottom strand primer at eh beginning of amp with complementarity to opposite end of amp. | HL1306:<br>GTATATATGAGTAAACTTGGTCTGACAGATTGAAGCATTTA<br>TCAGGGTTATTG                |
| Construction of deletions in pHL2410. Primer for fusion PCR. (Construct B, C, E, F, G, H, I, J, K)                                       | HL1191: TACTTGTTACCCATCATTGAA                                                       |
| Construction of deletions in pHL2410. Primer for fusion PCR. (Construct D)                                                               | HL1192: TCGCTTAAACATCAAATGCAT                                                       |
| Construction of deletions in pHL2410. Primer for fusion PCR. (Construct B, E, F, G, H, I, J, K)                                          | HL1193: CTCTTAGACAGTTCAACAA                                                         |
| Construction of deletions in pHL2410. Primer for fusion PCR. (Construct C, D)                                                            | HL1194: CACAGGAAACAGCTATGACC                                                        |
| Construction of deletions in pHL2410. Primer for fusion PCR. (Construct B)                                                               | HL1195: TTAATGATGTTTCGTCATCTTCTCATACAG                                              |
| Construction of deletions in pHL2410. Primer for fusion PCR. (Construct B)                                                               | HL1196:<br>AGCTGTATGAGAAGATGACGAACATCATTAATAGTGATAC<br>GCACATTGAAACATGGACGACTTTTAA  |
| Construction of deletions in pHL2410. Primer for fusion PCR. (Construct E, F, H)                                                         | HL1197: ATGTCCGATTGGCGGCTTACAGAAAATGTAC                                             |
| Construction of deletions in pHL2410. Primer for fusion PCR. (Construct H)                                                               | HL1198:<br>GTACATTTTCTGTAAGCCGCCAATCGGACATTAAGGTATAA<br>CGACAACAA ACGTTGCTTTATAT    |
| Construction of deletions in pHL2410. Primer for fusion PCR. (Construct G, I)                                                            | HL1199: AACTGCACCAGGCTGGATTTTCGTTACCTC                                              |
| Construction of deletions in pHL2410. Primer for fusion PCR. (Construct I)                                                               | HL1200:<br>GAGGTAAACGAAATCCAGCCTGGTGCAGTATATAAACTCC<br>GCATAACTCACTACAATAAACAACT    |
| Construction of deletions in pHL2410. Primer for fusion PCR (Construct J), and for ChIP assay ( <i>ade6</i> )                            | HL1201: TTATTTGAGTTTTGCATCGTATTAATTCTGT                                             |
| Construction of deletions in pHL2410. Primer for fusion PCR. (Construct J)                                                               | HL1202:<br>ACAGAATTAATACGATGCAAAACTCAAATAAATGAGCGAA<br>AAACAGGTTGTAGGGATCC          |
| Construction of deletions in pHL2410. Primer for fusion PCR. (Construct C)                                                               | HL1203: TATTCGATGAAGTATGTATATACCTTGGCAG                                             |
| Construction of deletions in pHL2410. Primer for fusion PCR. (Construct C)                                                               | HL1204:<br>CTGCCAAGGTATATACATACTTCATCGAATATGTATTATCA<br>TGGGTTCCGATTCTGATTTAAGCAA   |
| Construction of deletions in pHL2410. Primer for fusion PCR. (Construct D)                                                               | HL1208: CCAACAACAGGTGATTTCGACAGGATCTTTGA                                            |
| Construction of deletions in pHL2410. Primer for fusion PCR. (Construct D)                                                               | HL1209:<br>TCAAAGATCCTGTGCAATCACCTGTTGTTGGTTAGTTTCGAC<br>CATAGACATAACTGTTAAATGATTTG |
| Construction of deletions in pHL2410. Primer for fusion PCR. (Construct E)                                                               | HL1214:<br>GTACATTTTCTGTAAGCCGCCAATCGGACATATGAGCGAA<br>AAACAGGTTGTAGGGATCC          |
| Construction of deletions in pHL2410. Primer for fusion PCR. (Construct F)                                                               | HL1215:<br>GTACATTTTCTGTAAGCCGCCAATCGGACATATAAAGTCCG<br>CACTAACTCACTACAATAAACAACT   |
| Construction of deletions in pHL2410. Primer for fusion PCR. (Construct G)                                                               | HL1534:<br>GAGGTAAACGAAATCCAGCCTGGTGCAGTATATGAGCGAA<br>AAACAGGTTGTAGGGATCC          |
| Construction of deletions in pHL2410. Primer for fusion PCR. (Construct K)                                                               | HL1535: GAGTTTATTATTTGAGTTTTGCATCGTATT                                              |
| Construction of deletions in pHL2410. Primer for fusion PCR. (Construct K)                                                               | HL1536:<br>AATACGATGCAAAACTCAAATAATAAACTCATGAGCGAAA<br>AACAGGTTGTAGGGATCC           |

|                                                                                                         |                                                                                                                               |
|---------------------------------------------------------------------------------------------------------|-------------------------------------------------------------------------------------------------------------------------------|
| Construction of construct L in pHL2410. Forward primer containing <i>SpeI</i> at the end. (Construct L) | HL1490: GACTAGTCTTATTTGAGTTTGCATCGT                                                                                           |
| Construction of construct L in pHL2410. Reverse primer containing <i>XmaI</i> at the end. (Construct L) | HL1491: TCCCCCGGGGGGATAAGGTATAACGACAACAAA                                                                                     |
| Construction of deletions in pHL2410. Primer for fusion PCR. (Construct M)                              | HL1899:<br>GTACATTTTCTGTAAGCCGCCAATCGGACATAACTCAAATA<br>ATAAACTCCGCACTAACTACTACA                                              |
| Construction of deletions in pHL2410 with Tf1 (L). Primer for fusion PCR. (Construct M-L)               | HL1695: CAGAAGTCGGGCCAAACAAC                                                                                                  |
| Construction of deletions in pHL2410 with Tf1 (L). Primer for fusion PCR. (Construct M-L)               | HL1812:<br>GTACATTTTCTGTAAGCCGCCAATCGGACATTGTTAGCTAC<br>GCAGTTTGGTATTG                                                        |
| Construction of deletions in pHL2410 with Tf1 (R). Primer for fusion PCR. (Construct M-R)               | HL1840: ATCATGTCCGATTGGCGGCTTACAGAAAATGTAC                                                                                    |
| Construction of deletions in pHL2410 with Tf1 (R). Primer for fusion PCR. (Construct M-R)               | HL1841:<br>GTACATTTTCTGTAAGCCGCCAATCGGACATGATTGTCAGC<br>AATACTACACTACGCTATG                                                   |
| Construction of deletions in pHL2410 with Tf1 (R). Primer for fusion PCR. (Construct M-R)               | HL1842: GCTTCCATTGTAAGACTTTGTCTATATTTTCTTG                                                                                    |
| Construction of pHL2603. Primer for amplifying <i>SPCC4F11.03c</i> fragment.                            | HL1482: GGACTAGTGCATGCATTGGTGTATAACAAAGGC                                                                                     |
| Construction of pHL2603. Primer for amplifying <i>SPCC4F11.03c</i> fragment.                            | HL1483:<br>GAAGACGTCTGCAGGTAGTGTGAACAGGCAACTTCG                                                                               |
| Construction of pHL2688. Primer for amplifying <i>SPBC365.14c</i> fragment.                             | HL1484: GGACTAGTGTGCTTGACTTCTAATCTTCGGC                                                                                       |
| Construction of pHL2688. Primer for amplifying <i>SPBC365.14c</i> fragment.                             | HL1485:<br>GATATCCTGCAGGGACATGATAAACGCTCCCTTCCTCG                                                                             |
| Construction of pHL2693, <i>fbp1</i> UAS1-1nt mutation                                                  | HL1349: TTCCCAATCATCTACCTCACAAAGCATTAA                                                                                        |
| Construction of pHL2693, <i>fbp1</i> UAS1-1nt mutation                                                  | HL1350: CTAATGCTTTGTGAGGTAGATGATTGGGAA                                                                                        |
| Construction of pHL2709, <i>fbp1</i> UAS1-6nt mutation                                                  | HL1907:<br>CCTTTAGCACTTCCCAATCATGATGGAGACAAAGCATTAGT<br>ACTCATCATC                                                            |
| Construction of pHL2709, <i>fbp1</i> UAS1-6nt mutation                                                  | HL1908:<br>GATGATGAGTACTAATGCTTTGTCTCCATCATGATTGGGAA<br>GTGCTAAAGG                                                            |
| Construction of <i>atf1</i> deletion cassette.                                                          | HL1574:<br>GCTCCAATGGAGGGGCCGGATCTGTGCTAATGCGAATCC<br>AGCTGACCAATCCGATGGTGAACCTCCGTCT<br><b>TTCGTAGGCCGGATCCCCGGGTTAATTAA</b> |
| Construction of <i>atf1</i> deletion cassette.                                                          | HL1575:<br>CCGCTTCCGATGACACTTGTGCAACAGCAGCCGAATTACT<br>CTTGCCACTGGGCAGTCTTTATGAGCAATC<br><b>AATAAGGGAATTCGAGCTCGTTTAAAC</b>   |
| Primer for IN amplification                                                                             | HL1248:<br>AACATTCTAATTCTACATATGACAGATGATTTAAAAACCA<br>AG                                                                     |
| Primer for IN amplification                                                                             | HL1249:<br>TTCAATCAATTAGGATCCGTTCTCAGATATTTAGATTATTG                                                                          |
| Construction of NLS-TAP-IN.                                                                             | HL1262:<br>AACATTCTAATTCTATTAATTAATGGCGCCTAAGAAGAA<br>GCGTAAGGTTGTAAGCTGATGCGCAACAA<br><b>AATAAC</b>                          |
| Construction of NLS-TAP-IN.                                                                             | HL1263: AGTAAATTCAACAATTTGTATCATTTCG                                                                                          |
| ChIP analysis. Primer for testing <i>ade6</i> region.                                                   | HL2061: CCTGGTGCAGTATAAGGTATAACG                                                                                              |
| ChIP analysis. Primer for testing <i>fbp1</i> region.                                                   | HL2058: CCTGGATGACCAGTCATTATAG                                                                                                |
| ChIP analysis. Primer for testing <i>fbp1</i> region.                                                   | HL2059: CATGGCTTATACAGCTAAATG                                                                                                 |
| ChIP analysis. Primer for testing <i>act</i> region.                                                    | HL1446: GAAATCGCAGCGTTGGTTAT                                                                                                  |
| ChIP analysis. Primer for testing <i>act</i> region.                                                    | HL2063: GAATAGCAACATAAAAAGGCAGGTGC                                                                                            |
| Primer for <i>ade6</i> probe in nucleosomal array analysis.                                             | HL1317: CCTCGAGACGTACGGTGCGC                                                                                                  |
| Primer for <i>ade6</i> probe in nucleosomal array analysis.                                             | HL1318: CAAAATGCTTGATGATGCTATTTCAG                                                                                            |
| Primer for <i>fbp1</i> probe in nucleosomal array analysis.                                             | HL1444: AAGCTTTACCTTTAAGAATTG                                                                                                 |
| Primer for <i>fbp1</i> probe in nucleosomal array analysis.                                             | HL1445: GTGGAATTTTCACTAAGCTAC                                                                                                 |
| Primer for <i>ade6</i> probe in Northern blot analysis.                                                 | HL1448: GTGAGCACATTGATGCATCA                                                                                                  |
| Primer for <i>ade6</i> probe in Northern blot analysis.                                                 | HL1449: GGCAGCATCTTTCATCTTGC                                                                                                  |

|                                                         |                              |
|---------------------------------------------------------|------------------------------|
| Primer for <i>bub1</i> probe in Northern blot analysis. | HL1479: ATGTCCGATTGGCGGCTTAC |
| Primer for <i>bub1</i> probe in Northern blot analysis. | HL1480: CCTATGCCTTTCGATGCCAA |

Table S2: Construction of plasmids by fusion PCR.

| Plasmid; Description                     | Half and fusion products | Half product | Half product | Half and fusion products |
|------------------------------------------|--------------------------|--------------|--------------|--------------------------|
| pHL2541; Deletion amp from pHL414-2      | HL1303                   | HL1305       | HL1306       | HL1304                   |
| pHL2544; Deletion B                      | HL1191                   | HL1195       | HL1196       | HL1193                   |
| pHL2550; Deletion C                      | HL1191                   | HL1203       | HL1204       | HL1194                   |
| pHL2457; Deletion D                      | HL1192                   | HL1208       | HL1209       | HL1194                   |
| pHL2548; Deletion E                      | HL1191                   | HL1197       | HL1214       | HL1193                   |
| pHL2549; Deletion F                      | HL1191                   | HL1197       | HL1215       | HL1193                   |
| pHL2583; Deletion G                      | HL1191                   | HL1199       | HL1534       | HL1193                   |
| pHL2545; Deletion H                      | HL1191                   | HL1197       | HL1198       | HL1193                   |
| pHL2546; Deletion I                      | HL1191                   | HL1199       | HL1200       | HL1193                   |
| pHL2547; Deletion J                      | HL1191                   | HL1201       | HL1202       | HL1193                   |
| pHL2581; Deletion K, template was Del H. | HL1191                   | HL1535       | HL1536       | HL1193                   |
| pHL2686; Deletion M                      | HL1191                   | HL1197       | HL1899       | HL1193                   |
| pHL2674; Deletion M-L, template was A-L  | HL1191                   | HL1197       | HL1812       | HL1695                   |
| pHL2687; Deletion M-R, template was A-R  | HL1191                   | HL1840       | HL1841       | HL1842                   |

Table S3: Strains of *S. pombe*

| Yeast strains <sup>1</sup> | Tf1 expression plasmid | Target plasmid                                                         |
|----------------------------|------------------------|------------------------------------------------------------------------|
| YHL8964                    | pHL414-2               | pHL2410 (WT <i>bub1-ade6</i> , Construct A)                            |
| YHL9326                    | pHL2541                | pHL2410 (WT <i>bub1-ade6</i> , Construct A)                            |
| YHL9321                    | pHL2541                | pHL2548 (Construct E)                                                  |
| YHL9325                    | pHL2541                | pHL2583 (Construct G)                                                  |
| YHL9318                    | pHL2541                | pHL2545 (Construct H)                                                  |
| YHL9319                    | pHL2541                | pHL2546 (Construct I)                                                  |
| YHL9320                    | pHL2541                | pHL2547 (Construct J)                                                  |
| YHL9323                    | pHL2541                | pHL2581 (Construct K)                                                  |
| YHL9192                    | pHL2541                | pHL2543 (WT <i>fbp1</i> )                                              |
| YHL9085                    | pHL414-2               | pSP1 <sup>2</sup> (Empty vector)                                       |
| YHL9151                    | pHL2541                | pSP1 <sup>2</sup> (Empty vector)                                       |
| YHL9328                    | pHL2541                | pSP1 <sup>2</sup> (Empty vector)                                       |
| YHL9435-1, ~ 3.            |                        | pHL2410 (WT <i>bub1-ade6</i> , Construct A)                            |
| YHL9441                    |                        | pSP1 <sup>2</sup> (Empty vector)                                       |
| YHL9436-1, ~ 4.            |                        | pHL2698 (Construct A-L; Construct A with Tf1 in the left orientation)  |
| YHL9437-1, ~ 4.            |                        | pHL2699 (Construct A-R; Construct A with Tf1 in the right orientation) |
| YHL9438-1, ~ 4.            |                        | pHL2686 (Construct M)                                                  |
| YHL9439-1, ~ 4.            |                        | pHL2674 (Construct M-L; Construct M with Tf1 in the                    |

|                 |  |                                                                                             |
|-----------------|--|---------------------------------------------------------------------------------------------|
|                 |  | left orientation)                                                                           |
| YHL9440-1, ~ 4. |  | pHL2687 (Construct M-R; Construct M with Tf1 in the right orientation)                      |
| YHL9442-1, ~ 2. |  | pHL2547 (Construct J)                                                                       |
| YHL9443-1, ~ 4. |  | pHL2700 (Construct J-L; Construct J with Tf1 in the left orientation)                       |
| YHL9444-1, ~ 4. |  | pHL2701 (Construct J-R; Construct J with Tf1 in the right orientation)                      |
| YHL9526         |  | $h^+$ , <i>ura4-D18</i> , <i>leu1-32</i> , <i>ade6-M210</i> , <i>atf1::nat1</i>             |
| SPJ152          |  | <i>h90</i> , <i>ura4-D18</i> , <i>leu1-32</i> , <i>ade6-M216</i> , <i>atf1-Flag::KanMx6</i> |

<sup>1</sup> All plasmids were introduced into YHL1101 ( $h^+$ , *ura4-D18*, *leu1-32*, *ade6-M210*)

<sup>2</sup> Cottarel, G., Beach, D., and Deuschle, U. 1993. Two new multi-purpose multicopy *Schizosaccharomyces pombe* shuttle vectors, pSP1 and pSP2. *Curr Genet* **23** (5-6); 547-548

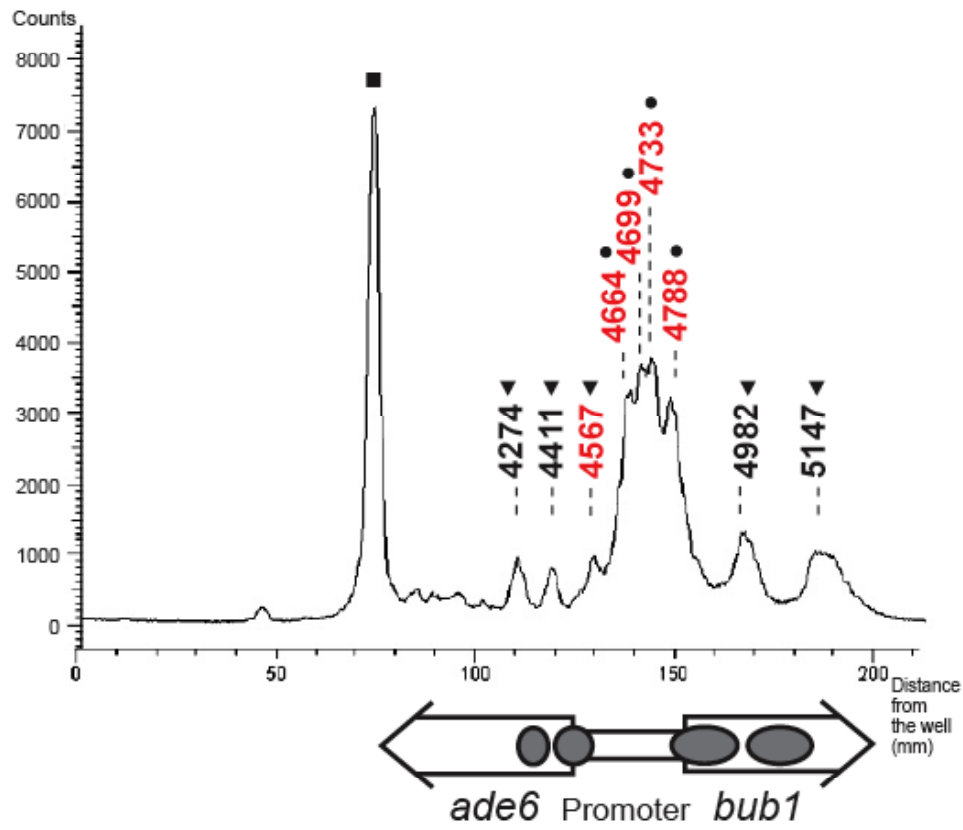

Fig. S1. The positions of MNase cleavages in *bub1-ade6*. The lane from the WT sample (Fig. 2D) treated with 20 units/ml MNase is shown in profile using ImageQuant TL software. The plasmid coordinates for each peak are shown. Coordinates within the intergenic sequence are shown in red.

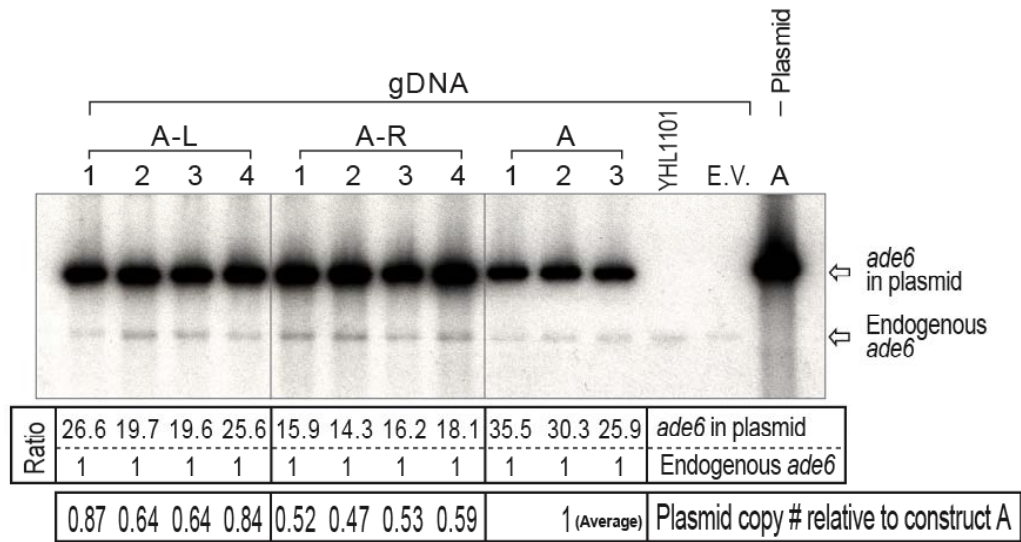

Fig. S2. The determination of plasmid copy numbers in each transformant containing the construct A series. The genomic DNAs from transformants harboring construct A, A-L, or A-R were digested by Bam HI and Sac I and were hybridized with the *ade6* specific probe. The sizes of the *ade6* fragments from the target plasmid and from the genomic DNA are 4.7kb and 2.6kb, respectively. The intensities of the *ade6* fragments were determined by phosphoimaging and the differences of the amounts loaded were adjusted by normalizing to the amounts of endogenous *ade6*. The copy numbers of the construct A-L and construct A-R target plasmid were normalized by the average value of 3 individual strains with construct A.



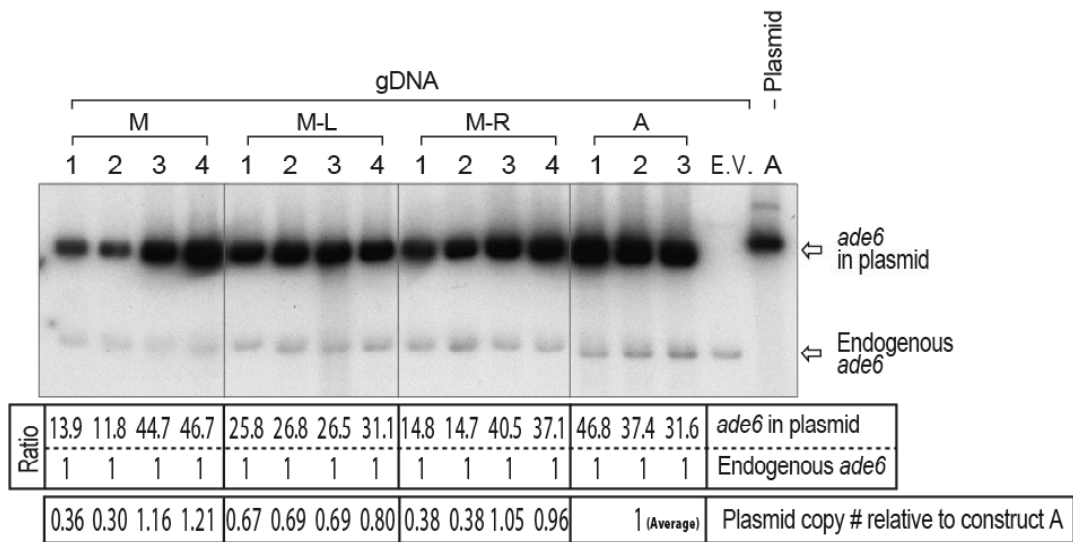

Fig. S3. The determination of plasmid copy numbers in each transformant containing the construct M series. The genomic DNAs from transformants harboring construct M, M-L, M-R, or A were digested by Bam HI and Sac I and were hybridized with the *ade6* specific probe. The sizes of the *ade6* fragments from the target plasmid and from the genomic DNA are 4.7kb and 2.6kb, respectively. The intensities of the *ade6* fragment were calculated by phosphoimaging as described in Fig. S2.

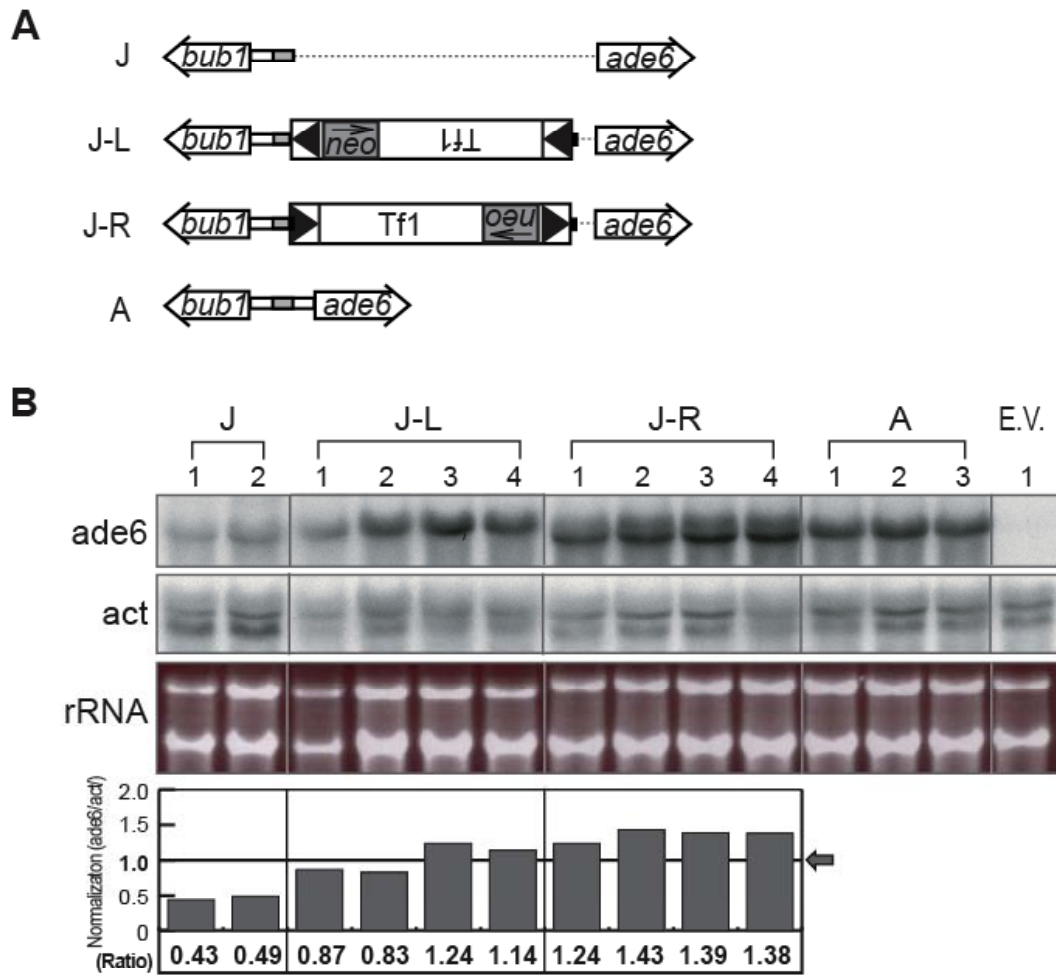

Fig. S4. The insertion of Tf1 in construct J repairs the damaged promoter. A. Diagrams of construct J, construct J with an insertion of Tf1-*neo* in the left orientation at position 4619 (J-L), construct J with an insertion of Tf1-*neo* in the right orientation at position 4619 (J-R), and construct A are shown. J-L and J-R are the resulting products of the targeting assay performed with a construct J target plasmid. B. The mRNA levels of *ade6* and actin were determined in cells (YHL9442-YHL9444, YHL9435, and YHL9441) containing the constructs shown in A by RNA blot analysis. The rRNA levels are shown as stained with ethidium bromide. The amounts of mRNA were quantified by phosphoimaging and each

*ade6* mRNA level was normalized to actin mRNA. The normalized *ade6* mRNA levels of construct J, J-L, and J-R were normalized further to the *ade6* level of construct A. The average value of *ade6* for construct A was set to 1.0 (arrow). The individual *ade6* mRNA values normalized are shown in the graph below.
